# Supplementary material for: The human nucleoporin Tpr protects cells from RNA-mediated replication stress
Source: PubMed Central journal article supplement (PMC8225803; doi:10.1038/s41467-021-24224-3), 2021-06-24
Supplement: 41467_2021_24224_MOESM2_ESM.pdf [file 41467_2021_24224_MOESM2_ESM.pdf]

## Reporting Summary

Nature Research wishes to improve the reproducibility of the work that we publish. This form provides structure for consistency and transparency in reporting. For further information on Nature Research policies, see [Authors & Referees](#) and the [Editorial Policy Checklist](#).

### Statistics

For all statistical analyses, confirm that the following items are present in the figure legend, table legend, main text, or Methods section.

n/a Confirmed

- |                                     |                                     |                                                                                                                                                                                                                                                            |
|-------------------------------------|-------------------------------------|------------------------------------------------------------------------------------------------------------------------------------------------------------------------------------------------------------------------------------------------------------|
| <input type="checkbox"/>            | <input checked="" type="checkbox"/> | The exact sample size ( $n$ ) for each experimental group/condition, given as a discrete number and unit of measurement                                                                                                                                    |
| <input type="checkbox"/>            | <input checked="" type="checkbox"/> | A statement on whether measurements were taken from distinct samples or whether the same sample was measured repeatedly                                                                                                                                    |
| <input type="checkbox"/>            | <input checked="" type="checkbox"/> | The statistical test(s) used AND whether they are one- or two-sided<br><i>Only common tests should be described solely by name; describe more complex techniques in the Methods section.</i>                                                               |
| <input checked="" type="checkbox"/> | <input type="checkbox"/>            | A description of all covariates tested                                                                                                                                                                                                                     |
| <input type="checkbox"/>            | <input checked="" type="checkbox"/> | A description of any assumptions or corrections, such as tests of normality and adjustment for multiple comparisons                                                                                                                                        |
| <input type="checkbox"/>            | <input checked="" type="checkbox"/> | A full description of the statistical parameters including central tendency (e.g. means) or other basic estimates (e.g. regression coefficient) AND variation (e.g. standard deviation) or associated estimates of uncertainty (e.g. confidence intervals) |
| <input type="checkbox"/>            | <input checked="" type="checkbox"/> | For null hypothesis testing, the test statistic (e.g. $F$ , $t$ , $r$ ) with confidence intervals, effect sizes, degrees of freedom and $P$ value noted<br><i>Give <math>P</math> values as exact values whenever suitable.</i>                            |
| <input checked="" type="checkbox"/> | <input type="checkbox"/>            | For Bayesian analysis, information on the choice of priors and Markov chain Monte Carlo settings                                                                                                                                                           |
| <input checked="" type="checkbox"/> | <input type="checkbox"/>            | For hierarchical and complex designs, identification of the appropriate level for tests and full reporting of outcomes                                                                                                                                     |
| <input checked="" type="checkbox"/> | <input type="checkbox"/>            | Estimates of effect sizes (e.g. Cohen's $d$ , Pearson's $r$ ), indicating how they were calculated                                                                                                                                                         |

*Our web collection on [statistics for biologists](#) contains articles on many of the points above.*

### Software and code

Policy information about [availability of computer code](#)

Data collection

Gatan Microscopy Suite Software, version 2.3.3 64 bit  
Leica Application Suite X, version 3.5.2.18963  
scanR software, version 2.3.0.7  
Zeiss ZEN software, for LSM microscope image acquisition

Data analysis

CellProfiler, version 3.1.8  
Enrich, <http://amp.pharm.mssm.edu/Enrichr>  
Fiji, version 1.52u  
GraphPad Prism, version 8.4.3.686  
ImageJ, version 2.1.0/1.53C  
LSM ZEN, version  
LightCycler 96, version 1.1.0.1320  
MaxQuant, version 1.5.2.8  
Metamorph, version v7.5.1.0  
Perseus, version 1.5.2.6  
STRING, version 11.0  
ZEISS ZEN lite 2012 software, analysis of LSM-acquired micrographs

For manuscripts utilizing custom algorithms or software that are central to the research but not yet described in published literature, software must be made available to editors/reviewers. We strongly encourage code deposition in a community repository (e.g. GitHub). See the Nature Research [guidelines for submitting code & software](#) for further information.

## Data

Policy information about [availability of data](#)

All manuscripts must include a [data availability statement](#). This statement should provide the following information, where applicable:

- Accession codes, unique identifiers, or web links for publicly available datasets
- A list of figures that have associated raw data
- A description of any restrictions on data availability

The datasets underlying proteomic analysis generated and analyzed during the current study are available in the Peptide Atlas repository, <http://www.peptideatlas.org>. Dataset Identifier: PASS01419. [[https://db.systemsbio.org/sbeams/cgi/PeptideAtlas/PASS\\_View?identifier=PASS01419](https://db.systemsbio.org/sbeams/cgi/PeptideAtlas/PASS_View?identifier=PASS01419)] Source data underlying Figures are provided in the source data file.

## Field-specific reporting

Please select the one below that is the best fit for your research. If you are not sure, read the appropriate sections before making your selection.

- Life sciences       Behavioural & social sciences       Ecological, evolutionary & environmental sciences

For a reference copy of the document with all sections, see [nature.com/documents/nr-reporting-summary-flat.pdf](https://www.nature.com/documents/nr-reporting-summary-flat.pdf)

## Life sciences study design

All studies must disclose on these points even when the disclosure is negative.

|                 |                                                                                                                                                                                                                                                                                                                                                                                                                                                                                                                                                                                                                                                                                                                                                                                                                                                                                                                                                                                                                                   |
|-----------------|-----------------------------------------------------------------------------------------------------------------------------------------------------------------------------------------------------------------------------------------------------------------------------------------------------------------------------------------------------------------------------------------------------------------------------------------------------------------------------------------------------------------------------------------------------------------------------------------------------------------------------------------------------------------------------------------------------------------------------------------------------------------------------------------------------------------------------------------------------------------------------------------------------------------------------------------------------------------------------------------------------------------------------------|
| Sample size     | <p>Sample size for the experiments shown was chosen to obtain statistical power, in conformity to accepted standard sample size in a number of previous publications using these approaches:<br/>           Lukas C, et al. 53BP1 nuclear bodies form around DNA lesions generated by mitotic transmission of chromosomes under replication stress. <i>Nature cell biology</i> 13, 243-253 (2011).<br/>           Giannattasio M, Zwicky K, Follonier C, Foiani M, Lopes M, Branzei D. Visualization of recombination-mediated damage bypass by template switching. <i>Nature structural &amp; molecular biology</i> 21, 884-892 (2014).</p> <p>For DNA fiber experiments, if equivalent experiments were not different statistically (p-value of t-test &lt;0.001), the total number of DNA fibers from both experiments is presented.</p> <p>Untreated control cells, with drug- vehicle, or cells transfected with Non-Targeting (NT kd) siRNA control were included as appropriate controls for each specific experiment.</p> |
| Data exclusions | No exclusion was applied.                                                                                                                                                                                                                                                                                                                                                                                                                                                                                                                                                                                                                                                                                                                                                                                                                                                                                                                                                                                                         |
| Replication     | For all experiments, the number of biological replicates is indicated and reproduced the representative data are shown in figures.                                                                                                                                                                                                                                                                                                                                                                                                                                                                                                                                                                                                                                                                                                                                                                                                                                                                                                |
| Randomization   | We were working with asynchronously growing cell populations or individual DNA replication molecules from these cell populations, therefore further randomization was not necessary for our approaches.                                                                                                                                                                                                                                                                                                                                                                                                                                                                                                                                                                                                                                                                                                                                                                                                                           |
| Blinding        | Individual repetitions for the Clonogenic cell survival assay, DNA fiber analysis and Electron microscopy analysis were blinded to the investigators. For the automated acquisition of 53BP1 foci blinding was not necessary due to intrinsically unbiased nature of the approach.                                                                                                                                                                                                                                                                                                                                                                                                                                                                                                                                                                                                                                                                                                                                                |

## Reporting for specific materials, systems and methods

We require information from authors about some types of materials, experimental systems and methods used in many studies. Here, indicate whether each material, system or method listed is relevant to your study. If you are not sure if a list item applies to your research, read the appropriate section before selecting a response.

### Materials & experimental systems

| n/a                                 | Involved in the study                                           |
|-------------------------------------|-----------------------------------------------------------------|
| <input type="checkbox"/>            | <input checked="" type="checkbox"/> Antibodies                  |
| <input type="checkbox"/>            | <input checked="" type="checkbox"/> Eukaryotic cell lines       |
| <input checked="" type="checkbox"/> | <input type="checkbox"/> Palaeontology                          |
| <input checked="" type="checkbox"/> | <input type="checkbox"/> Animals and other organisms            |
| <input type="checkbox"/>            | <input checked="" type="checkbox"/> Human research participants |
| <input checked="" type="checkbox"/> | <input type="checkbox"/> Clinical data                          |

### Methods

| n/a                                 | Involved in the study                              |
|-------------------------------------|----------------------------------------------------|
| <input checked="" type="checkbox"/> | <input type="checkbox"/> ChIP-seq                  |
| <input type="checkbox"/>            | <input checked="" type="checkbox"/> Flow cytometry |
| <input checked="" type="checkbox"/> | <input type="checkbox"/> MRI-based neuroimaging    |

## Antibodies used

DNA fiber analysis:  
 BrdU (Bio-Rad, #OBT0030, 1:1000)  
 BrdU (BD Biosciences, #347580, 1:1000)  
 Alexa Fluor 568 (Thermo Fisher Scientific, # A-11077, 1:500)  
 Alexa Fluor 488 (Thermo Fisher Scientific, #A-21202, 1:500)

Immunoblotting:  
 ATR (Cell Signaling, #2790, 1:1000)  
 phospho-ATR (Thr1989) (Cell Signaling, #58014, 1:1000)  
 Chk1 (Santa Cruz Biotechnology, #sc-8408, 1:1000)  
 phospho-Chk1 (Ser345) (Cell Signaling, #2348, 1:1000)  
 phospho-Chk1 (Ser317) (Cell Signaling, #12302, 1:1000)  
 Cyclin A2 (Abcam, #ab16726, 1:000)  
 GANP (Abcam, #ab113295, 1:1000)  
 GANP (Sigma-Aldrich, #HPA021527, 1:1000)  
 GFP (Amsbio, TP401, 1:2500)  
 MATR3 (Bethyl, #A300-591A, 1:1000)  
 PTBP1 (Thermo Fisher Scientific, #32-4800, 1:000)  
 RPA32 (Abcam, #ab16855, 1:2000)  
 phospho-RPA32 (S4/S8) (Bethyl, #A300-245A, 1:1000)  
 SUGP2 (Sigma-Aldrich, #HPA061111, 1:1000)  
 Tpr (Sigma-Aldrich, #HPA019661, 1:1000)  
 tubulin (Sigma-Aldrich, #T5168, 1:5000)  
 Goat Anti-Mouse IgG (H + L)-HRP Conjugate (BIO-RAD, #1706516, 1:5000)  
 Goat Anti-Rabbit IgG (H + L)-HRP Conjugate (BIO-RAD, #1706515, 1:5000)

Immunostaining:  
 Cyclin A2 (Abcam, #ab16726, 1:200)  
 Flag M2 (Sigma-Aldrich, #F1804, 1:100)  
 GANP (Sigma-Aldrich, #HPA021527, 1:100)  
 phospho-H2A.X (Ser139) (Millipore JBW301, #05-636, 1:500)  
 Nucleolin (Abcam, #ab50279, 1:1000)  
 S9.6 (Hybridoma cell line HB-8730, 1:100)  
 Tpr (Sigma-Aldrich, #HPA019661, 1:100)  
 53BP1 (Novus Biologicals, #NB100-304, 1:500)  
 Alexa Fluor 488 (Thermo Fisher Scientific, #A-21206, 1:400),  
 Alexa Fluor 488 (Molecular Probes, #A11008 and #A11029, 1:1000),  
 Alexa Fluor 546 (Molecular Probes, #A21123, 1:1000),  
 Alexa Fluor 568 (Molecular Probes, #A11011, 1:1000),  
 Alexa Fluor 594 (Molecular Probes, #A21201, 1:1000),  
 Alexa Fluor 647 (Molecular Probes, #A21244 and #A21463, 1:1000)  
 Cy3 (Jackson ImmunoResearch Laboratories, #715-165-150, 1:400)

Immunohistochemical analysis:  
 Tpr (Sigma-Aldrich, #HPA019661, 1:1000)  
 Tpr (Sigma-Aldrich, #HPA024336, diluted 1:250)  
 GANP (Sigma-Aldrich, #HPA021527, diluted 1: 250)

## Validation

All primary antibodies used in this study are commercially available and show the band of the expected size. In addition, the following antibodies were further validated for our approaches using siRNA directed against the protein of interest in U-2OS cells:

ATR (Cell Signaling, #2790), siRNA (Thermo Fisher Scientific, siRNA ID: s536)  
 phospho-ATR (Thr1989) (Cell Signaling, #58014), siRNA (Thermo Fisher Scientific, siRNA ID: s536)  
 Tpr (Sigma-Aldrich, #HPA019661), siRNAs (Thermo Fisher Scientific, siRNAs ID: s14353, s14354, s14355)  
 GANP (Sigma-Aldrich, #HPA021527), siRNAs (Thermo Fisher Scientific, siRNAs ID: s16987, s16988, s16989)  
 MATR3 (Bethyl, #A300-591A), siRNA (Thermo Fisher Scientific, siRNA ID: s18897)  
 PTBP1 (Thermo Fisher Scientific, #32-4800), siRNA (Thermo Fisher Scientific, siRNA ID: s11434)  
 SUGP2 (Sigma-Aldrich, #HPA061111), (Thermo Fisher Scientific, siRNA ID: s19759)

Following primary antibodies used in this study were also validated by the companies and/or cited in the research papers:

DNA fiber analysis:  
 BrdU (Bio-Rad, #OBT0030, 1:1000), cited in 238 research papers  
 BrdU (BD Biosciences, #347580, 1:1000), cited in 736 research papers

Immunoblotting:  
 ATR (Cell Signaling, #2790, 1:1000), cited in 84 research papers  
 phospho-ATR (Thr1989) (Cell Signaling, #58014, 1:1000), cited in 5 research papers  
 Chk1 (Santa Cruz Biotechnology, #sc-8408, 1:1000), cited in 621 research papers  
 phospho-Chk1 (Ser345) (Cell Signaling, #2348, 1:1000), cited in 487 research papers  
 phospho-Chk1 (Ser317) (Cell Signaling, #12302, 1:1000), cited in 63 research papers  
 Cyclin A2 (Abcam, #ab16726, 1:000), cited in 27 research papers

GANP (Abcam, #ab113295, 1:1000), cited in 1 research paper  
 GANP (Sigma-Aldrich, #HPA021527, 1:1000), validated by the company and cited in 1 research paper  
 GFP (Amsbio, TP401, 1:2500), cited in 21 research papers  
 MATR3 (Bethyl, #A300-591A, 1:1000), cited in 25 research papers  
 PTBP1 (Thermo Fisher Scientific, #32-4800, 1:000), cited in 36 research papers  
 RPA32 (Abcam, #ab16855, 1:2000), cited in 10 research papers  
 phospho-RPA32 (S4/S8) (Bethyl, #A300-245A, 1:1000), cited in 250 research papers  
 SUGP2 (Sigma-Aldrich, #HPA061111, 1:1000), validated by the company  
 Tpr (Sigma-Aldrich, #HPA019661, 1:1000), validated by the company and cited in 3 research papers  
 tubulin (Sigma-Aldrich, #T5168, 1:5000), cited in 3048 research papers

#### Immunostaining:

Cyclin A2 (Abcam, #ab16726, 1:200), cited in 27 research papers  
 Flag M2 (Sigma-Aldrich, #F1804, 1:100), cited in 5110 research papers  
 GANP (Sigma-Aldrich, #HPA021527, 1:100), validated by the company and cited in 1 research paper  
 phospho-H2A.X (Ser139) (Millipore JBW301, #05-636), validated by the company and cited in 2303 research papers  
 Nucleolin (Abcam, #ab50279, 1:1000), validated by the company and cited in 18 research papers  
 S9.6 (Hybridoma cell line HB-8730, 1:100), cited in 5 research papers  
 Tpr (Sigma-Aldrich, #HPA019661, 1:100), validated by the company and cited in 3 research papers  
 53BP1 (Novus Biologicals, #NB100-304, 1:500), validated by the company and cited in 427 research papers

#### Immunohistochemical analysis:

Tpr (Sigma-Aldrich, #HPA019661, 1:1000), validated by the company and cited in 3 research papers  
 Tpr (Sigma-Aldrich, #HPA024336, diluted 1:250), validated by the company and cited in 3 research papers  
 GANP (Sigma-Aldrich, #HPA021527, diluted 1: 250), validated by the company and cited in 1 research paper

## Eukaryotic cell lines

### Policy information about [cell lines](#)

|                                                                   |                                                                                                                                                                |
|-------------------------------------------------------------------|----------------------------------------------------------------------------------------------------------------------------------------------------------------|
| Cell line source(s)                                               | HeLa cells (European Collection of Authenticated Cell Cultures: ECACC)<br>U-2 OS cells (ATCC)<br>BJ cells (ATCC)<br>MCF10A cells (ATCC)                        |
| Authentication                                                    | Cell lines were purchased from ECACC or ATCC and authenticated by STR method.                                                                                  |
| Mycoplasma contamination                                          | All cell lines used in this study were negative for mycoplasma. We regularly check by PCR the presence of mycoplasma in all cell lines used in our laboratory. |
| Commonly misidentified lines (See <a href="#">ICLAC</a> register) | No commonly misidentified cell lines were used in this study.                                                                                                  |

## Human research participants

### Policy information about [studies involving human research participants](#)

|                            |                                                                                                                                                                                                                                                                                                                                                                                                                                                                                                                                                                                                                                                                                                                                                                                                                                                            |
|----------------------------|------------------------------------------------------------------------------------------------------------------------------------------------------------------------------------------------------------------------------------------------------------------------------------------------------------------------------------------------------------------------------------------------------------------------------------------------------------------------------------------------------------------------------------------------------------------------------------------------------------------------------------------------------------------------------------------------------------------------------------------------------------------------------------------------------------------------------------------------------------|
| Population characteristics | The patient population consisted of Caucasian females from Spain, aged 25 to 86 years (mean 54.8 years). The patients were not treated before the surgical operations, which were performed in the period 1995-2005. No genetic information was available on either the patients or the ovarian tumors.                                                                                                                                                                                                                                                                                                                                                                                                                                                                                                                                                    |
| Recruitment                | These were consecutive cases of tumors surgically resected during the period 1995-2005, and the archival paraffin blocks from the tumors stored at the Department of Pathology, University Hospital, Las Palmas, Gran Canaria. The only selection that was undertaken was to examine only invasive serous carcinoma types in this retrospective immunohistochemical study, in order to ensure a homogenous cohort of the most common type of ovarian malignancy (i.e. other types of ovarian tumors from the above period were not included). All patients provided written informed consent for the usage of their tissue specimens for research at the time of surgical operation. There was no self-selection or other bias in selecting the archival paraffin specimens for this study, except for the histologically diagnosed serous carcinoma type. |
| Ethics oversight           | The study was performed in accordance with the Spanish codes of conduct (Ley de Investigació n Biomedica) and with the World Medical Association Declaration of Helsinki, after approval by the review board of the participating institution: the University Hospital, Las Palmas, Gran Canaria, Spain.                                                                                                                                                                                                                                                                                                                                                                                                                                                                                                                                                   |

Note that full information on the approval of the study protocol must also be provided in the manuscript.

### Plots

Confirm that:

- The axis labels state the marker and fluorochrome used (e.g. CD4-FITC).
- The axis scales are clearly visible. Include numbers along axes only for bottom left plot of group (a 'group' is an analysis of identical markers).
- All plots are contour plots with outliers or pseudocolor plots.
- A numerical value for number of cells or percentage (with statistics) is provided.

### Methodology

Sample preparation

U-2 OS cells were labeled with 10  $\mu$ M EdU for 20 minutes. Next, cells were fixed using 3.6% PFA in 1 x PBS for 15 min and permeabilized with 0.25% Triton-X for at room temperature for 15 min. S-phase cells were detected using Click-iT EdU Alexa Fluor 488 Imaging Kit (Invitrogen, #C10337) according to the manufacturer's protocol, and total DNA content was stained using propidium iodide (2.5  $\mu$ g/ml) in the presence of RNase A (250  $\mu$ g/ml). Samples were analyzed by flow cytometry.

Instrument

FACS ATTUNE NXT THERMO FISHER

Software

Attune Nxt for acquisition and FLOWJO 10 for analysis

Cell population abundance

*Describe the abundance of the relevant cell populations within post-sort fractions, providing details on the purity of the samples and how it was determined.*

Gating strategy

PI-positive cells (gated cell cycle without doublets) were analyzed for Edu-A488 positive and negative

- Tick this box to confirm that a figure exemplifying the gating strategy is provided in the Supplementary Information.
